# Supplementary material for: Topological engineering of two-dimensional ionic liquid islands for high structural stability and CO2 adsorption selectivity
Source: Royal Society of Chemistry journal article supplement (doi:10.1039/d1sc05431g), 2021-01-01
Supplement: d1sc05431g1.pdf [file d1sc05431g1.pdf]

**Supporting Information for**

**Topological engineering of two-dimensional ionic liquid islands for high structural stability and CO<sub>2</sub> adsorption selectivity**

*Chenlu Wang,<sup>[a][b]</sup> Yanlei Wang,\*<sup>[a][b]</sup> Zhongdong Gan,<sup>[a]</sup> Yumiao Lu,<sup>[a]</sup> Cheng Qian,<sup>[d]</sup> Feng Huo,<sup>[a]</sup> Hongyan He\*<sup>[a][b][c]</sup> and Suojiang Zhang\*<sup>[a][b]</sup>*

<sup>[a]</sup>Beijing Key Laboratory of Ionic Liquids Clean Process, State Key Laboratory of Multiphase Complex Systems, CAS Key Laboratory of Green Process and Engineering, Institute of Process Engineering, Chinese Academy of Sciences, Beijing 100190, China.

<sup>[b]</sup>University of Chinese Academy of Sciences, Beijing 100049, China.

<sup>[c]</sup>Innovation Academy for Green Manufacture, Chinese Academy of Sciences, Beijing 100190, China.

<sup>[d]</sup>School of Materials Science and Engineering, Ulsan National Institute of Science and Technology, Ulsan 44919, South Korea.

Corresponding Authors: [ylwang17@ipe.ac.cn](mailto:ylwang17@ipe.ac.cn); [hyhe@ipe.ac.cn](mailto:hyhe@ipe.ac.cn); [sjzhang@ipe.ac.cn](mailto:sjzhang@ipe.ac.cn)

## Table of Contents

| Section                                       | Title                         | Page |
|-----------------------------------------------|-------------------------------|------|
| <b>Supplementary Movies</b>                   | Supplementary Movie M1        | S3   |
|                                               | Supplementary Movie M2        |      |
|                                               | Supplementary Movie M3        |      |
|                                               | Supplementary Movie M4        |      |
| <b>Supplementary Note</b>                     | $N_{\text{pairs}}$            | S4   |
|                                               | $E_{\text{f}}$                |      |
|                                               | $\Delta E$                    |      |
|                                               | $E_{\text{gas}}$              |      |
|                                               | $p_{\text{gas-QM}}$           |      |
|                                               | $p_{\text{gas-MD}}$           |      |
|                                               | $S_{\text{CO}_2/\text{gas}2}$ |      |
| <b>Supplementary Figures<br/>and Captions</b> | Figure S1                     | S5   |
|                                               | Figure S2                     | S6   |
|                                               | Figure S3                     | S7   |
|                                               | Figure S4                     | S8   |
|                                               | Figure S5                     | S9   |
|                                               | Figure S6                     | S10  |
|                                               | Figure S7                     | S11  |
|                                               | Figure S8                     | S12  |
|                                               | Figure S9                     | S13  |
|                                               | Figure S10                    | S14  |
|                                               | Figure S11                    | S15  |
|                                               | Figure S12                    | S16  |
| <b>Supplementary Tables</b>                   | Table S1                      | S17  |
|                                               | Table S2                      |      |

## Supplementary Movies

### Supplementary Movie M1

The formation process of two-dimensional ionic liquid islands (2DIIs).

### Supplementary Movie M2

The 10-ns long MD simulation of  $N_2$  molecules adsorb on the  $P_4$ -based 2DII with (4,4), at  $T = 300$  K and  $P = 0.88$  bar.

### Supplementary Movie M3

The 11.5-ns long MD simulation of  $CO_2$  molecules adsorb on the  $P_4$ -based 2DII with (4,4), at  $T = 300$  K and  $P = 0.88$  bar.

### Supplementary Movie M4

The 3-ns long MD simulation of  $CO_2$  molecules adsorb on the  $P_3$ -based 2DII with (3,2), at  $T = 300$  K and  $P = 0.88$  bar.

## Supplementary Note

### $N_{\text{pairs}}$

For  $P_{1/2/4}$ -based 2DIIs,  $N_{\text{pairs}} = m \cdot n$ , where  $m$  and  $n$  are the numbers of cation-anion pairs along  $Z_4$  and  $Z_5$  sides, respectively. For  $P_3$ -based 2DIIs,  $N_{\text{pairs}} = 3 \cdot m \cdot n$ , where  $m$  and  $n$  are the number of  $P_3$  along  $E_1$  and  $E_2$  edges, respectively.

### $E_f$

$E_f = [E_{\text{hyb}} - (E_{\text{sub}} + N_{\text{pairs}}E_{\text{IL}})]/N_{\text{pairs}}$ , where  $E_{\text{hyb}}$ ,  $E_{\text{sub}}$ , and  $E_{\text{IL}}$  are total energies of the optimized hybrid IL-graphite system, the optimized graphite substrate, and the optimized isolate EmimPF<sub>6</sub> pair, respectively.

### $\Delta E$

$\Delta E = (E_{\text{AIMD}} - E_{\text{hyb}})/N_{\text{pairs}}$ , where  $E_{\text{AIMD}}$  is the total energy of the hybrid IL-graphite system after the 5-ps long AIMD.

### $E_{\text{gas}}$

$E_{\text{gas}} = E_{\text{hyb\&gas}} - (E_{\text{hyb}} + E_{\text{gas-only}})$ , where  $E_{\text{hyb\&gas}}$ , and  $E_{\text{gas-only}}$  are total energies of the optimized hybrid gas-IL-graphite system, and the optimized isolate gas molecule, respectively.

### $p_{\text{gas-QM}}$

$p_{\text{gas-QM}} = \exp(-E_{\text{gas}, R_{\text{site}}}/k_B T) / \sum_i \exp(-E_{\text{gas}, R_i}/k_B T)$ , where  $k_B$  is the Boltzmann constant, and  $T$  is set as 300 K. For  $P_{1/2/4}$ -based 2DIIs,  $R_i$  is respectively  $R_{\text{above}}$ ,  $R_{\text{vertex}}$ ,  $R_{Z_4}$ , and  $R_{Z_5}$ , while  $R_{\text{site}}$  is the specific  $R_i$ . For  $P_3$ -based 2DIIs,  $R_i$  is respectively  $R_{\text{above}}$ ,  $R_{\text{vertex}}$ ,  $R_{E_1}$ ,  $R_{E_2}$ , and  $R_{\text{in}}$ , while  $R_{\text{site}}$  is the specific  $R_i$ .

### $p_{\text{gas-MD}}$

$p_{\text{gas-MD}} = N_{\text{gas}, R_{\text{site}}}/N_{\text{gas}}$ , where  $N_{\text{gas}, R_{\text{site}}}$  is the number of gas molecules adsorbed on the  $R_{\text{site}}$  and  $N_{\text{gas}}$  is the total number of gas molecules in the hybrid gas-IL-graphite system.

### $S_{\text{CO}_2/\text{gas}_2}$

$S_{\text{CO}_2/\text{gas}_2} = \exp(-E_{\text{gas}, \text{CO}_2}/k_B T) / (\exp(-E_{\text{gas}, \text{CO}_2}/k_B T) + \exp(-E_{\text{gas}, \text{gas}_2}/k_B T))$ , where  $\text{gas}_2$  is one of the three gases: CO, N<sub>2</sub>, and CH<sub>4</sub>.

## Supplementary Figures and Captions

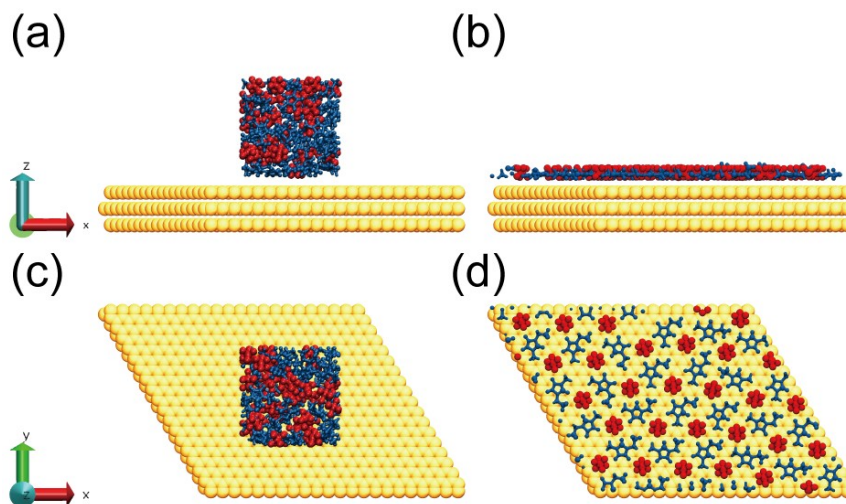

**Figure S1.** (a) The initial atomic structure of the hybrid IL-graphite system for MD simulations, from the main view, where red, blue, and yellow colors represent  $[\text{PF}_6]^-$ ,  $[\text{Emim}]^+$ , C atoms in graphite, respectively. The PBC box has 28 pairs of EmimPF<sub>6</sub> and 2376 atoms in graphite. We performed the 20-ns NVT dynamics at 300 K, using temperature and barostat coupling constants of 0.1 ps and 0.1 ps, respectively. (b) The equilibrated atomic structure of the hybrid IL-graphite system, from the main view, with the monolayer EmimPF<sub>6</sub>. (c) The initial atomic structure of the hybrid IL-graphite system for MD simulations, from the top view. (d) The equilibrated atomic structure of the hybrid IL-graphite system, from the top view.

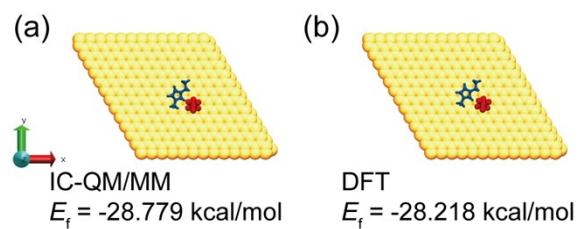

**Figure S2.** (a) The atomic structure of the hybrid IL-graphite system after geometry optimization by the IC-QM/MM approach, where  $E_f = -28.779$  kcal/mol. (b) The atomic structure of the hybrid IL-graphite system after geometry optimization by the DFT method, where  $E_f = -28.218$  kcal/mol.

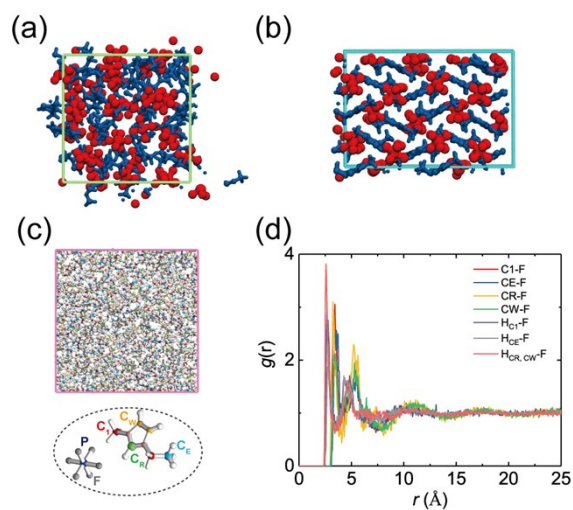

**Figure S3.** (a-b) Atomic structures of the three-dimensional (3D) ILs after the 5-ps AIMD simulation by the IC-QM/MM approach, consisting of 32 pairs of EmimPF<sub>6</sub>, where lime, red, blue, and cyan colors represent the PBC box of 3D bulk IL, [PF<sub>6</sub>]<sup>-</sup>, [Emim]<sup>+</sup>, the PBC box of 3D crystal IL, respectively. (c) Atomic structures of the 3D bulk IL after 10-ns MD simulation with  $T = 300$  K, consisted of 200 pairs of EmimPF<sub>6</sub>, where mauve, red, yellow, lime, cyan, silver, and blue colors represent the PBC box, C<sub>1</sub> atom, C<sub>W</sub> atom, C<sub>R</sub> atom, C<sub>E</sub> atom, F atom, and P atom, respectively. It should be noted that the C<sub>R</sub> atom is a C<sub>2</sub> atom, and C<sub>W</sub> atoms include C<sub>4</sub> and C<sub>5</sub> atoms. (d) The radial distribution function (RDF) between C atom and F atom or H atom and F atom.

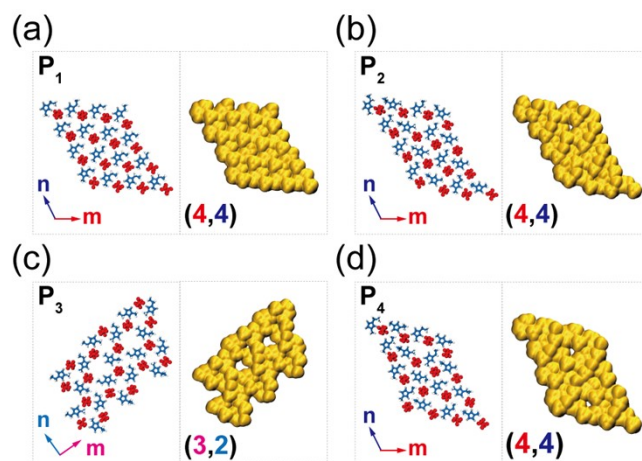

**Figure S4.** (a-d) Atomic structures and simulated STM images of the  $P_{1/2/3/4}$ -based 2DIIIs with (4,4) or (3,2), respectively. Bias energy for the generation of all STM images is 20 eV, and the iso-contour value of all STM images is  $5.0 \times 10^{-5}$  Hartree.



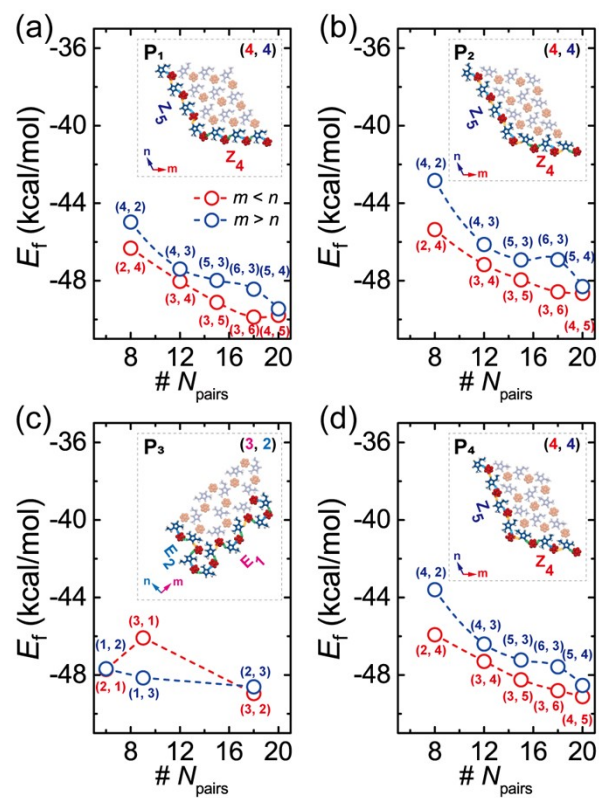

**Figure S5.** (a-d)  $E_f$  changes with  $N_{\text{pairs}}$  for  $P_{1/2/3/4}$ -based 2DIIs. The inserts show schematic diagrams of different edge structures, where blue, green, and orange colors represent  $HB_2$ ,  $HB_4$ , and  $HB_5$ , respectively.

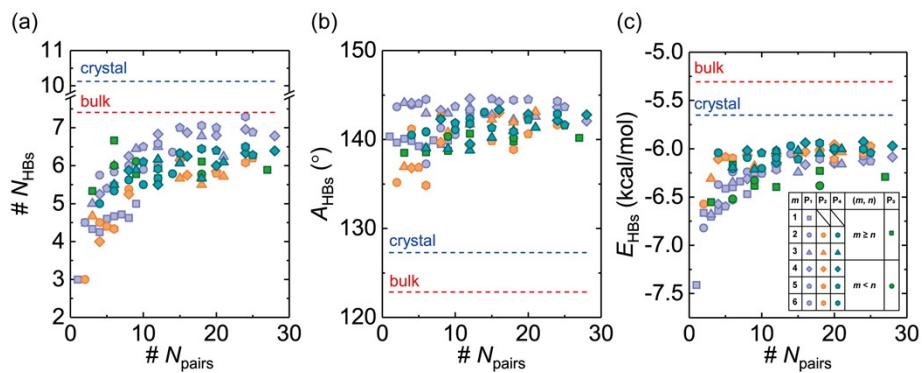

**Figure S6.** (a-c) The number ( $N_{\text{HBs}}$ ), angle ( $A_{\text{HBs}}$ ), and energy ( $E_{\text{HBs}}$ ) of HBs in 2DIIs and 3D ILs, respectively.

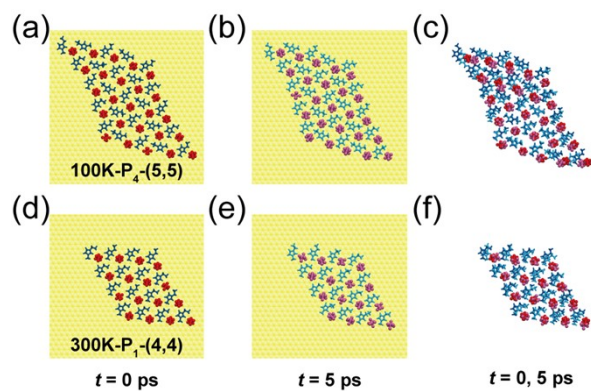

**Figure S7.** (a-f) Atomic structures of representative 2DIIIs at different AIMD simulation time ( $t$ ) with  $T = 300$  and  $100$  K, where red, blue, mauve, cyan and yellow colors represent  $[\text{PF}_6]^-$  at  $t = 0$  ps,  $[\text{Emim}]^+$  at  $t = 0$  ps,  $[\text{PF}_6]^-$  at  $t = 5$  ps,  $[\text{Emim}]^+$  at  $t = 5$  ps, C atoms in graphite, respectively.

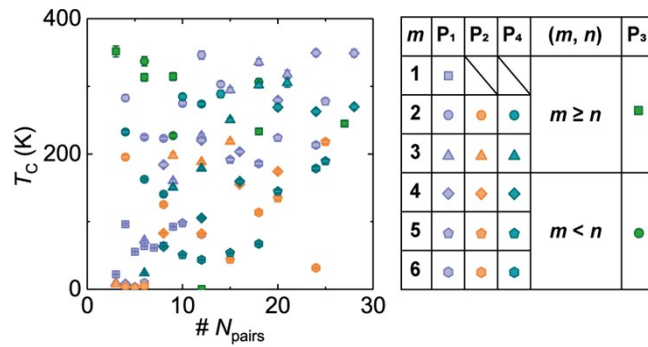

**Figure S8.**  $T_c$  for various 2DIIs as a function of  $N_{\text{pairs}}$ .

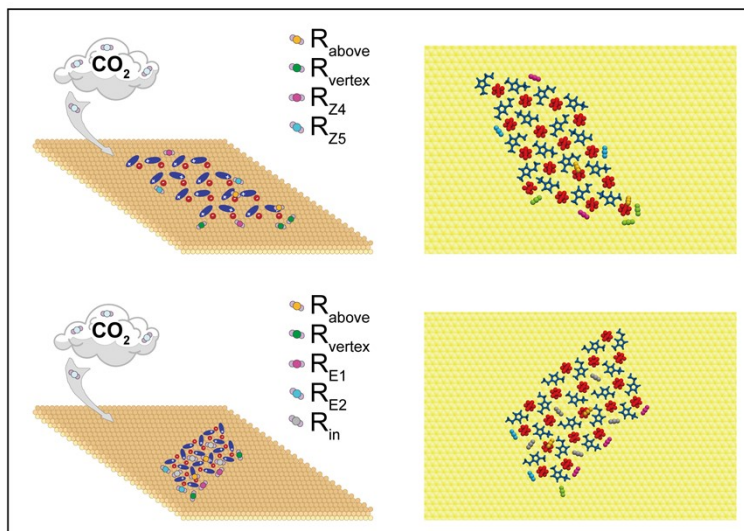

**Figure S9.** Schematic diagrams and atomic structures of  $\text{CO}_2$  molecules adsorbed on different sites of  $\text{P}_4$ -based and  $\text{P}_3$ -based 2DIIs. Considering the unique structure of 2DIIs, different adsorbed sites are proposed: the region above the 2DII ( $R_{\text{above}}$ ), the vertex position ( $R_{\text{vertex}}$ ), the edge regions ( $R_{\text{edge}}$ :  $R_{Z4}/R_{Z5}$ ,  $R_{E1}/R_{E2}$ ), inside the 2DII ( $R_{\text{in}}$ ), and the other ( $R_{\text{other}}$ ). In schematic diagrams and atomic structures, orange, olive, magenta, blue, and silver colors represent  $R_{\text{above}}$ ,  $R_{\text{vertex}}$ ,  $R_{Z4/E1}$ ,  $R_{Z5/E2}$ , and  $R_{\text{in}}$ , respectively.

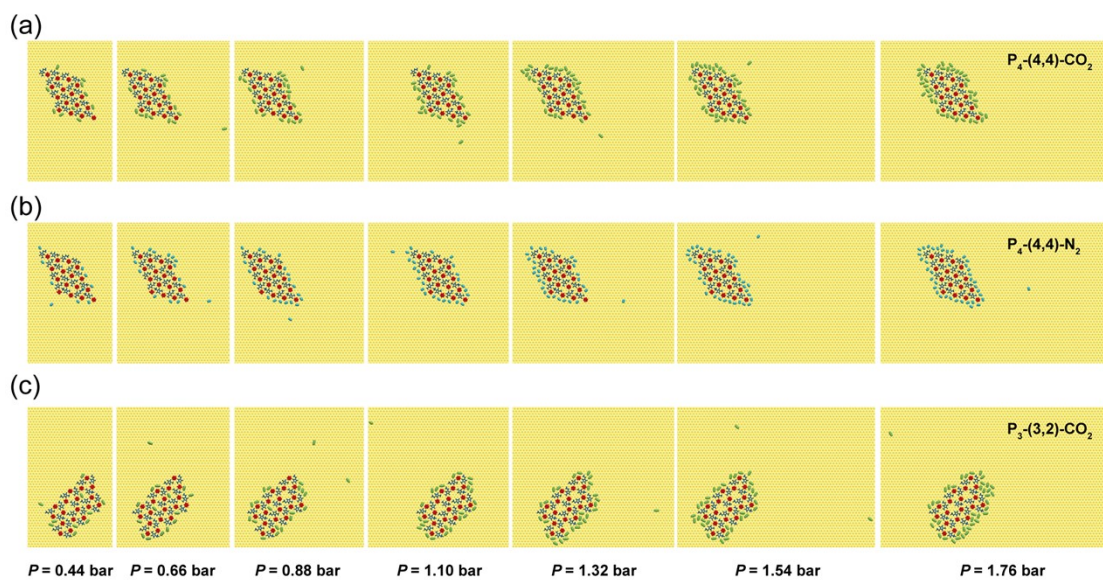

**Figure S10.** (a-c) Atomic structures of  $\text{CO}_2$  and  $\text{N}_2$  molecules adsorbed on the representative 2DIIs, as  $P$  ranges from 0.44 to 1.76 bar, where lime and cyan colors represent  $\text{CO}_2$  and  $\text{N}_2$ , respectively.

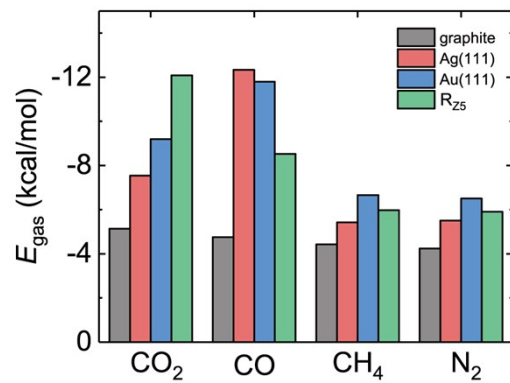

**Figure S11.**  $E_{\text{gas}}$  of CO<sub>2</sub>, CO, CH<sub>4</sub> and N<sub>2</sub> molecules adsorbed on the P<sub>4</sub>-based 2DII with (4,4), Au(111), Ag(111), and graphene.

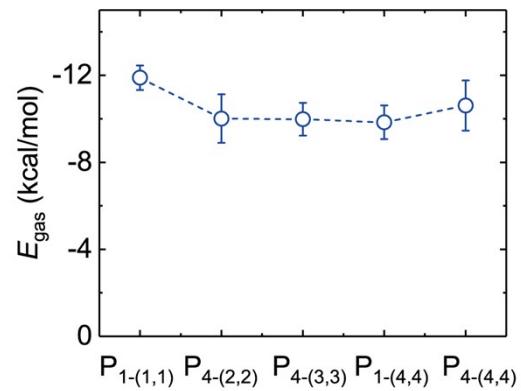

**Figure S12.**  $E_{\text{gas}}$  of CO<sub>2</sub> adsorbed on the phase boundaries of various 2DIIs.



## Supplementary Tables

**Table S1.** The  $E_f$  of four subunits ( $P_N$ ,  $N = 1, 2, 3, 4$ ).

| Type             | $P_{1-(1,1)}$ | $P_{2-(2,1)}$ | $P_{3-(1,1)}$ | $P_{4-(2,2)}$ |
|------------------|---------------|---------------|---------------|---------------|
| $E_f$ (kcal/mol) | -30.97197     | -32.01704     | -44.63873     | -41.31702     |

**Table S2.** The density ( $\rho$ ) of four 2DIIs and 3D ILs.

| Type                        | $P_{1-(2,2)}$ | $P_{2-(2,2)}$ | $P_{3-(1,1)}$ | $P_{4-(2,2)}$ | bulk | bulk | crystal |
|-----------------------------|---------------|---------------|---------------|---------------|------|------|---------|
| $T$ (K)                     | ---           | ---           | ---           | ---           | 500  | 300  | 100     |
| $\rho$ (g/cm <sup>3</sup> ) | 1.47          | 1.53          | 1.41          | 1.47          | 1.22 | 1.42 | 1.49    |
|                             | $\pm 0.41$    | $\pm 0.46$    | $\pm 0.31$    | $\pm 0.41$    | ---  | ---  | ---     |
